# Supplementary material for: Mechanism of aging effect in hybrid-doped BaTiO3 ceramics: electronegativity and ionic radius
Source: Royal Society of Chemistry journal article supplement (doi:10.1039/c6ra23546h), 2016-01-01
Supplement: c6ra23546h1.pdf [file c6ra23546h1.pdf]

## Supplementary

### XRD

The in-situ XRD data were recorded by Shimadzu XRD-7000 using Cu  $K_{\alpha}$  X-ray radiation ( $\lambda=0.154\text{nm}$ ) with  $\theta-2\theta$  diffraction geometry. In order to avoid the local stress due to intergranular interaction of the bulk sample, the ceramic specimen for XRD measurement was ground into fine-sized powder.<sup>1</sup>

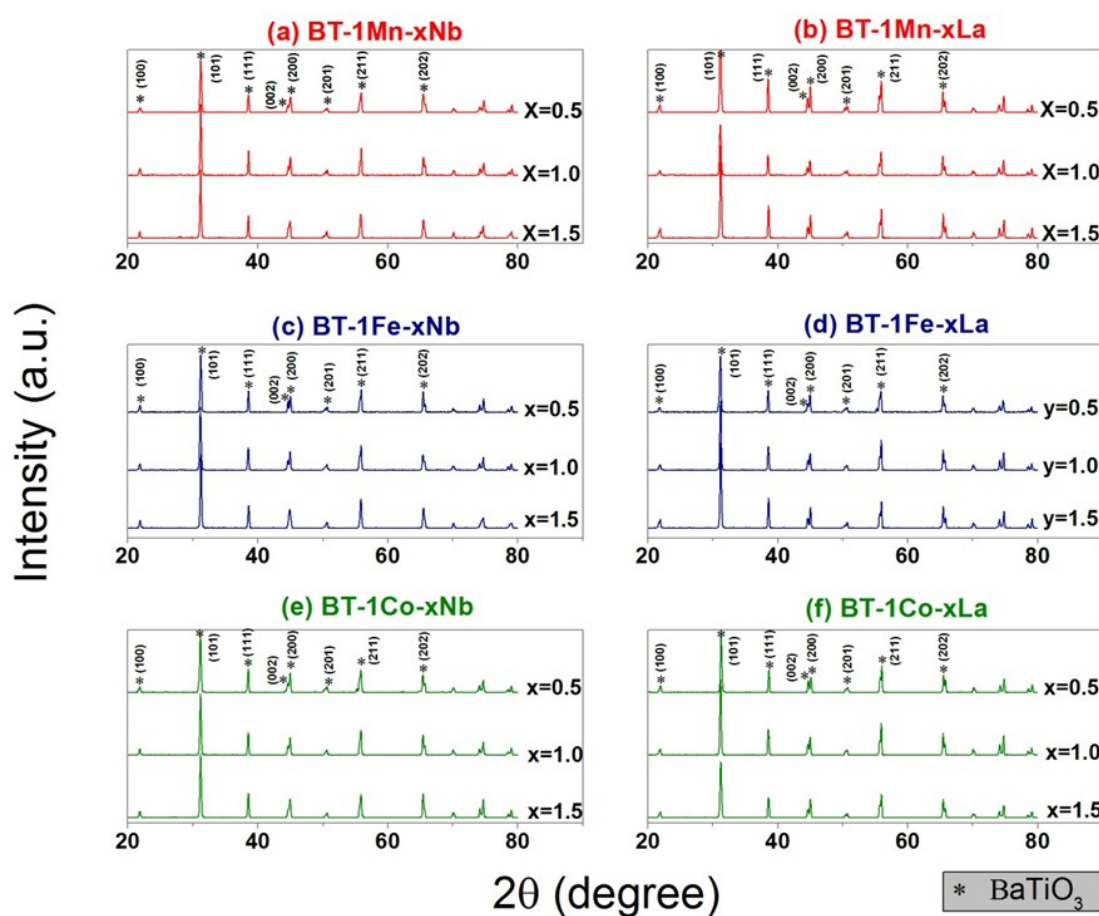

Fig. 1 X-ray diffraction patterns of (a) BT-1Mn-xNb, (b) BT-1Mn-xLa, (c) BT-1Fe-xNb, (d) BT-1Fe-xLa, (e) BT-1Co-xNb and (f) BT-1Co-xLa.

## SEM

SEM micrographs of the fractured surface of specimens were taken by scanning electron microscope JSM-7000F. The SEM images are shown in Fig. 2-4 for different acceptor/donor ratio cases respectively.

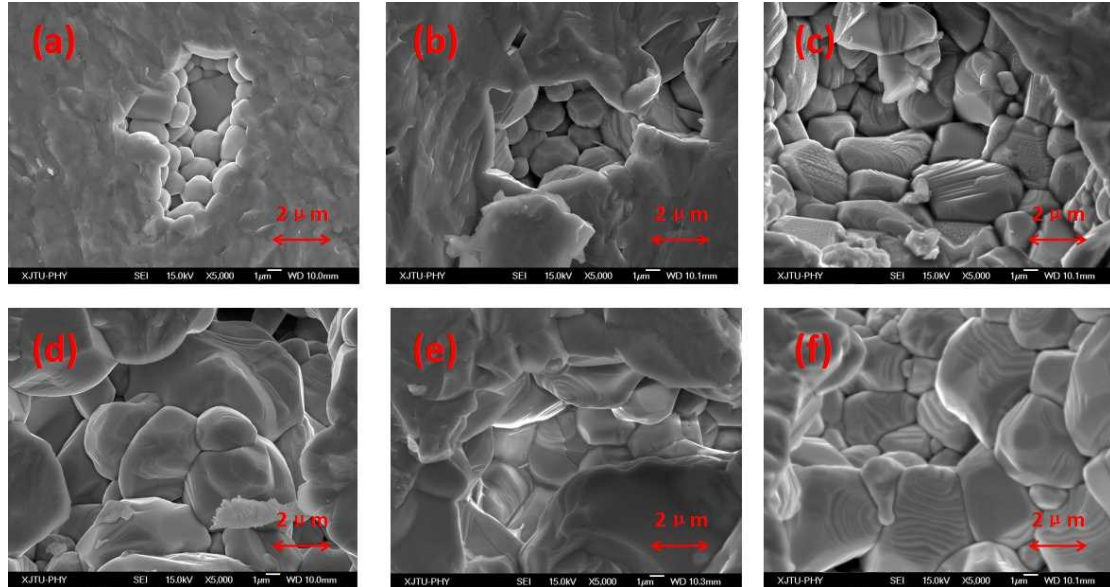

Fig. 2 SEM images of acceptor-dominant hybrid-doped  $\text{BaTiO}_3$  samples. (a) BT-1Mn-0.5Nb, (b) BT-1Fe-0.5Nb, (c) BT-1Co-0.5Nb, (d) BT-1Mn-0.5La, (e) BT-1Fe-0.5La, (f) BT-1Co-0.5La.

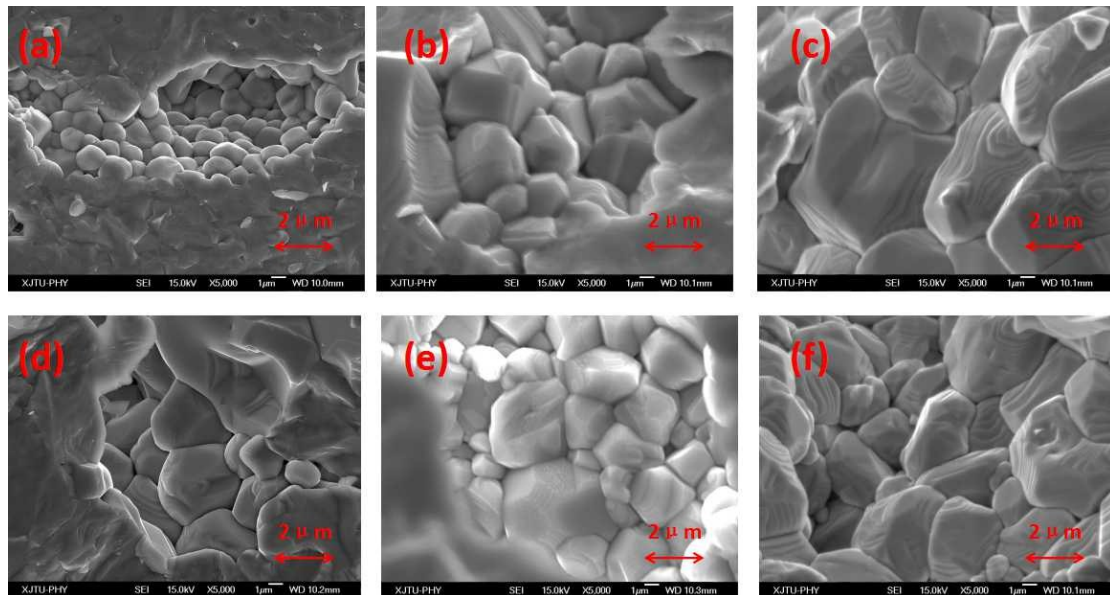

Fig. 3 SEM images of equal-doped hybrid-doped  $\text{BaTiO}_3$  samples. (a) BT-1Mn-1Nb, (b) BT-1Fe-1Nb, (c) BT-1Co-1Nb, (d) BT-1Mn-1La, (e) BT-1Fe-1La, (f) BT-1Co-1La.

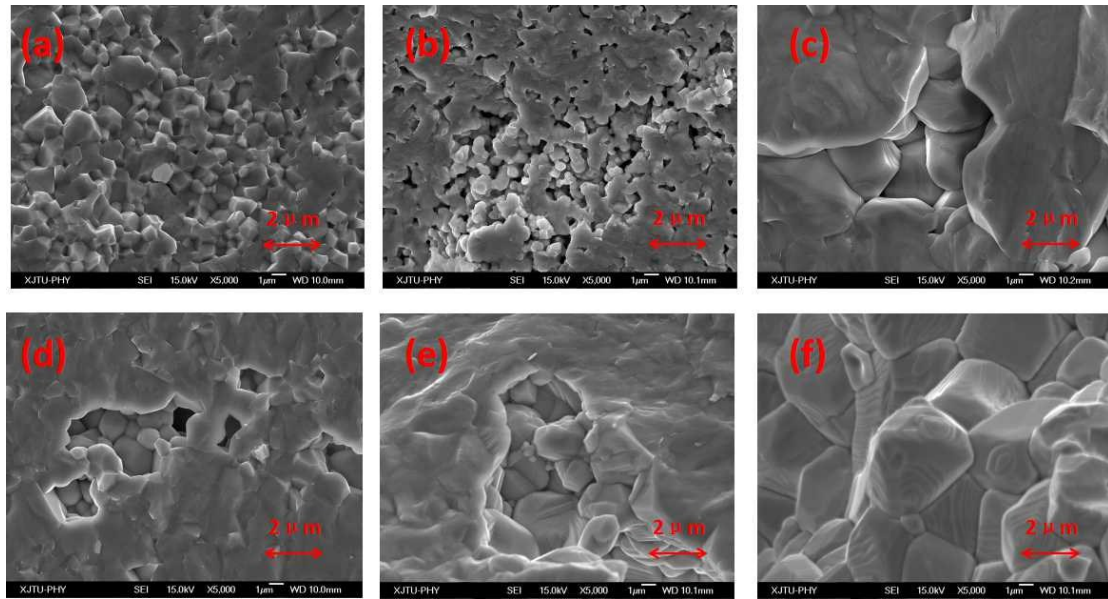

Fig. 4 SEM images of donor-dominant hybrid-doped  $\text{BaTiO}_3$  samples. (a) BT-1Mn-1.5Nb, (b) BT-1Fe-1.5Nb, (c) BT-1Co-1.5Nb, (d) BT-1Mn-1.5La, (e) BT-1Fe-1.5La, (d)BT-1Co-1.5La.

The homogeneous and completely fine-grained microstructure with grain size ranged from  $1.0\text{-}4.0\ \mu\text{m}$ , without any indication of abnormal grains.

## Reference

1. J. Gao, S. Ren, L. Zhang, Y. Hao, M. Fang, M. Zhang, Y. Dai, X. Hu, D. Wang and L. Zhong, Applied Physics Letters, 2015, 107, 113.
